# Supplementary material for: Impact of Serum Chemerin Levels on Liver Functional Reserves and Platelet Counts in Patients with Hepatocellular Carcinoma
Source: MDPI journal article supplement (doi:10.3390/ijms150711294), 2014-06-25
Supplement: s1 [file s1]

# Supplementary Information

**Table S1.** Correlation coefficients among chemerin and other six clinical variables that were correlated with serum chemerin level by Pearson regression analysis.

| Variable         | Child-Pugh Score | ALB                     | ALT     | T-Bil                  | PLT                  | PT                      | Chemerin               |
|------------------|------------------|-------------------------|---------|------------------------|----------------------|-------------------------|------------------------|
| Child-Pugh score |                  | −0.5785 <sup>*,††</sup> | −0.0692 | 0.5158 <sup>*,††</sup> | −0.3399 <sup>*</sup> | −0.6703 <sup>*,††</sup> | −0.3732 <sup>*</sup>   |
| ALB              |                  |                         | −0.0579 | −0.0229                | 0.2238               | 0.2835                  | 0.3110 <sup>*</sup>    |
| ALT              |                  |                         |         | 0.2077                 | −0.1543              | −0.0267                 | −0.3864 <sup>*</sup>   |
| T-Bil            |                  |                         |         |                        | −0.3690 <sup>*</sup> | −0.4259 <sup>*</sup>    | −0.4023 <sup>*,†</sup> |
| PLT              |                  |                         |         |                        |                      | 0.3601 <sup>*</sup>     | 0.4159 <sup>*,†</sup>  |
| PT               |                  |                         |         |                        |                      |                         | 0.3775 <sup>*</sup>    |
| Chemerin         |                  |                         |         |                        |                      |                         |                        |

<sup>\*</sup>  $p < 0.05$ ; <sup>††</sup>  $p < 0.0036$  (overall  $p < 0.05$ ); <sup>†</sup>  $p < 0.0071$  (overall  $p < 0.1$ ) by Bonferroni-corrected comparisons.
